# Supplementary material for: Multi-stimuli-responsive fluorescence of a highly emissive difluoroboron complex in both solution and solid states
Source: Royal Society of Chemistry journal article supplement (doi:10.1039/c6ce02376b), 2017-01-01
Supplement: c6ce02376b1.pdf [file c6ce02376b1.pdf]

## Supporting Information

### Multi-stimuli fluorescent responsive of a strongly emissive difluoroboron complex in both solution and solid states

Wenyan Fang<sup>a,b</sup>, Yuyang Zhang<sup>a</sup>, Gaobin Zhang<sup>a</sup>, Lin Kong<sup>a,\*</sup>, Longmei Yang<sup>a</sup>, Jiayang Yang<sup>a,c,\*</sup>

<sup>a</sup>College of Chemistry & Chemical Engineering, Key Laboratory of Functional Inorganic Materials of Anhui Province, Anhui University, Hefei 230601 PRChina <sup>b</sup>College of Chemistry and Materials Engineering of Huainan Normal University, Anhui, Huainan 232038, PR China

<sup>c</sup>State Key Laboratory of Crystal Materials, Shandong University, Jinan 502100, PR China

[kong\\_lin2009@126.com](mailto:kong_lin2009@126.com); [jxyang@ahu.edu.cn](mailto:jxyang@ahu.edu.cn)

---

#### Contents

|                                                                                              |   |
|----------------------------------------------------------------------------------------------|---|
| Supporting Information.....                                                                  | 1 |
| 1 <sup>1</sup> H and <sup>13</sup> C NMR of target compound TC and its precursor.....        | 1 |
| 2 TGA and DTG curve of TC.....                                                               | 3 |
| 3 The time-dependent DFT (TD-DFT) calculations.....                                          | 3 |
| 4 Single crystal parameter.....                                                              | 4 |
| 5 Parameter of solvents.....                                                                 | 6 |
| 6 The molecular structure, dihedral angle and the distances of TC molecular interplanar..... | 6 |
| 7 Electron density distributions of the frontier molecular orbitals.....                     | 7 |

# $^1\text{H}$ and $^{13}\text{C}$ NMR of target compound TC and its precursor

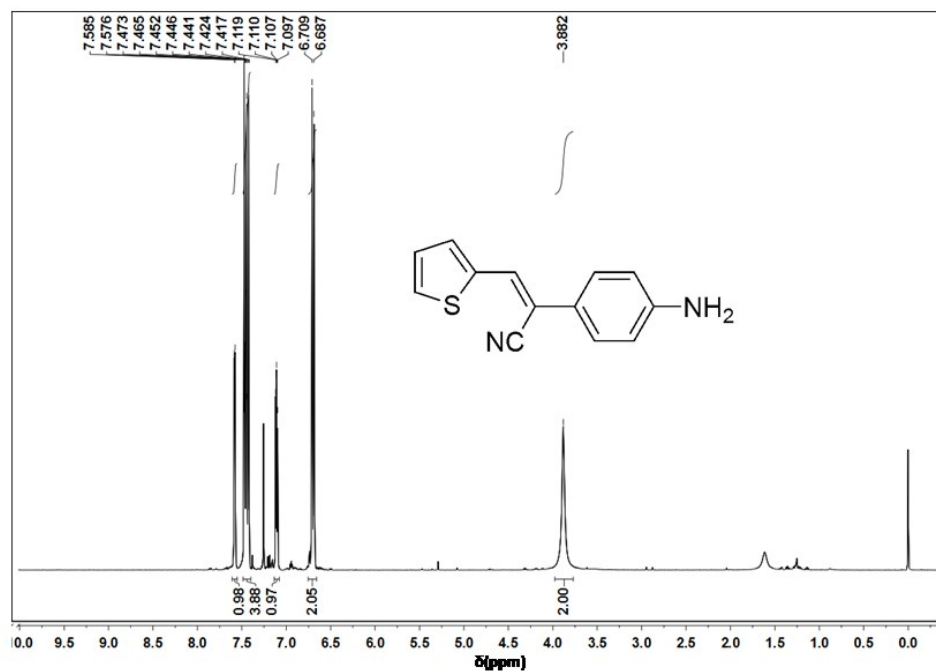

Fig. S1  $^1\text{H}$  NMR of S2

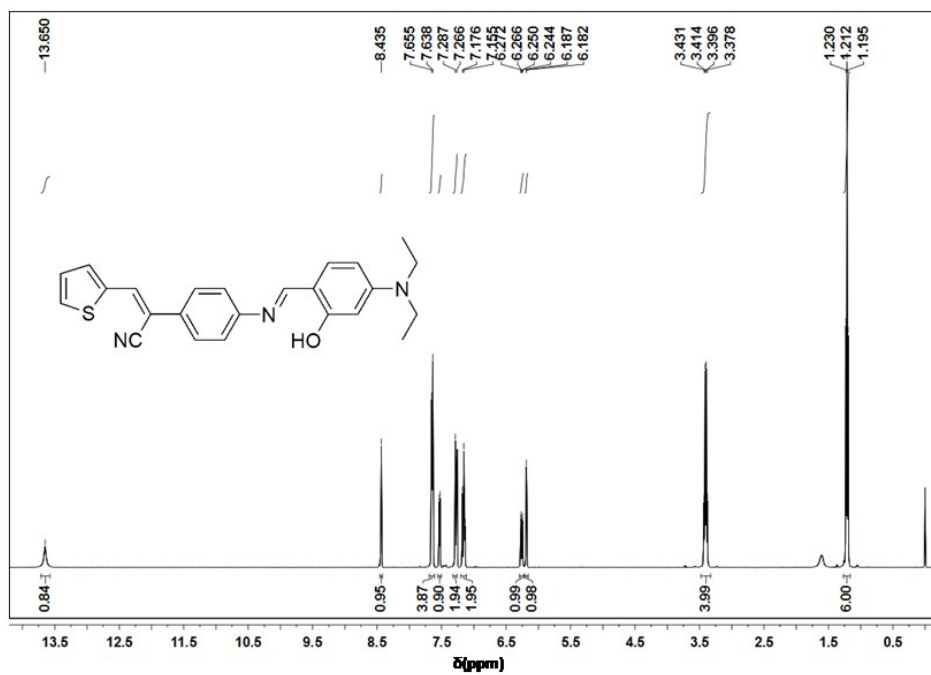

Fig. S2  $^1\text{H}$  NMR of S3

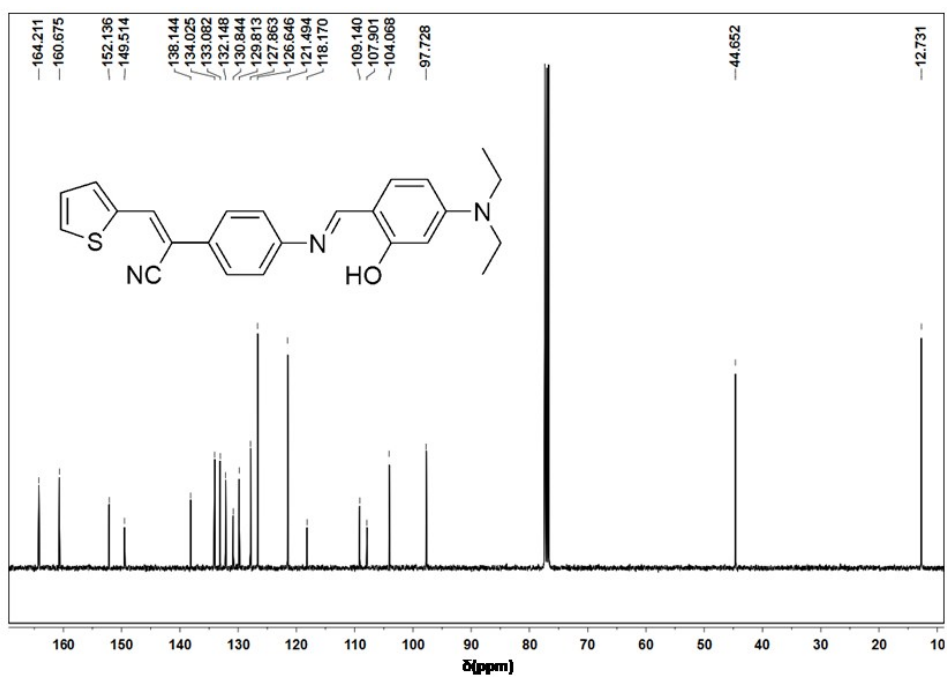

Fig. S3  $^{13}\text{C}$  NMR of S3

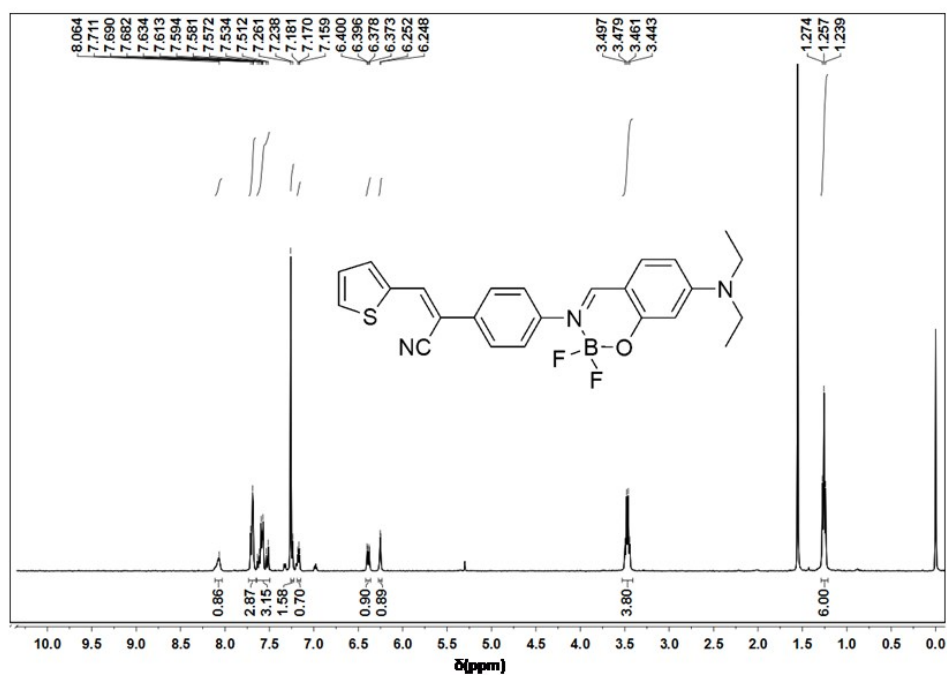

Fig. S4  $^1\text{H}$  NMR of TC

## 2 TGA and DTG curve of TC

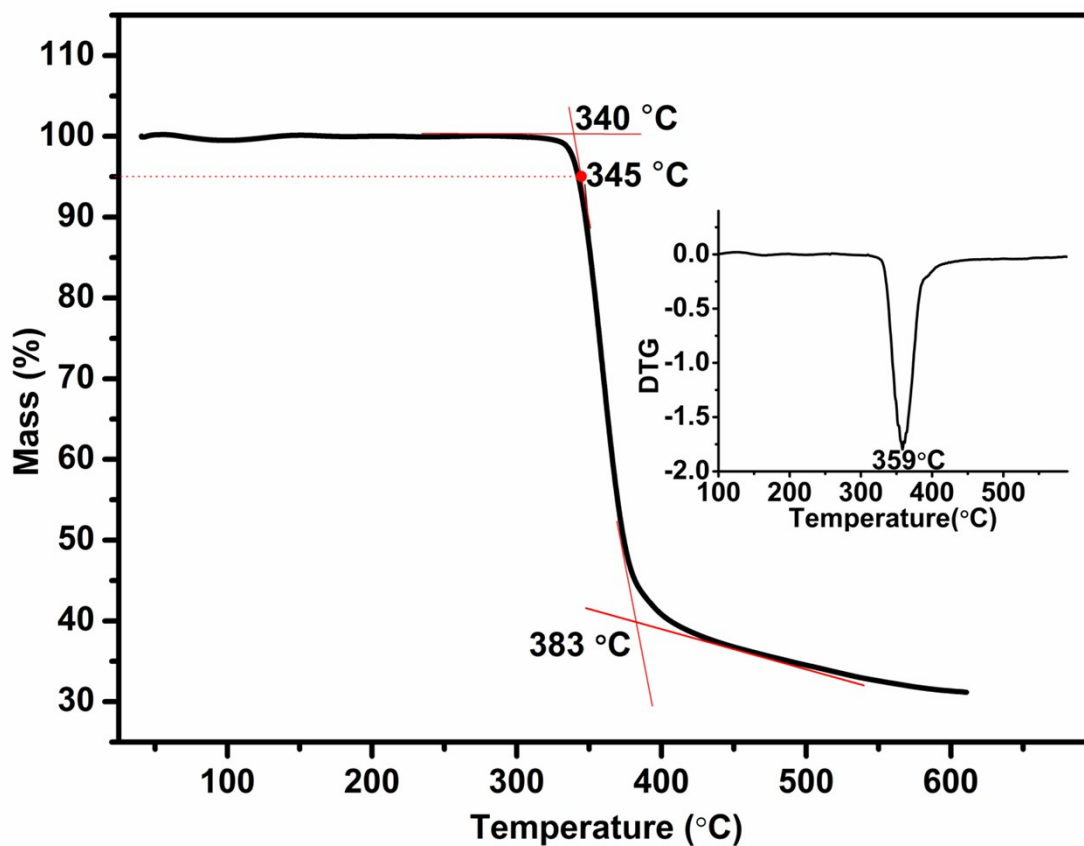

Fig. S5 The TGA curve of TC recorded under nitrogen at a heating rate of 10 °C/min. The inserts is DTG curves.

## 3 The time-dependent DFT (TD-DFT) calculations

Table S1 The wavelength of absorption maximum, oscillator strength and major contributions for the TC and S3

| Compound | Experimental $\lambda$ (nm) | Theoretical $\lambda$ (nm) | Osc. strength | Major contributions (% coefficients)                     |
|----------|-----------------------------|----------------------------|---------------|----------------------------------------------------------|
| TC       | 420                         | 423                        | 1.3757        | H $\rightarrow$ L (64%)                                  |
| S3       | 415                         | 412                        | 0.1064        | H-3 $\rightarrow$ L (43%)<br>H $\rightarrow$ L + 1 (43%) |

---

## 4 Single crystal parameter

Table S2 The data of single crystal **S3**

---

|                     |                                                   |                                          |               |
|---------------------|---------------------------------------------------|------------------------------------------|---------------|
| empirical formula   | C <sub>24</sub> H <sub>23</sub> N <sub>3</sub> OS | Z                                        | 8             |
| formula weight      | 401.52                                            | T (K)                                    | 296(2) K      |
| crystal system      | Monoclinic                                        | D <sub>calcd</sub> (g cm <sup>-3</sup> ) | 1.282         |
| space group         | C2/c                                              | μ (mm <sup>-1</sup> )                    | 0.176         |
| a (Å)               | 26.886(3)                                         | θ range (deg)                            | 1.74 to 24.99 |
| b (Å)               | 10.6027(18)                                       | total no. of reflns                      | 14422         |
| c (Å)               | 16.7359(18)                                       | no. of unique reflns                     | 3657          |
| α (deg)             | 90                                                | no. of params refined                    | 265           |
| β (deg)             | 119.293(2)                                        | R1                                       | 0.0396        |
| γ (deg)             | 90                                                | wR2                                      | 0.1184        |
| V (Å <sup>3</sup> ) | 4160.8(10)                                        | GOF                                      | 1.074         |
| CCDC number         | 96763                                             |                                          |               |

---

Table S3 The data of single **TC**

|                     |                                                                     |                                          |               |
|---------------------|---------------------------------------------------------------------|------------------------------------------|---------------|
| empirical formula   | C <sub>24</sub> H <sub>22</sub> B F <sub>2</sub> N <sub>3</sub> O S | Z                                        | 4             |
| formula weight      | 449.32                                                              | T (K)                                    | 296(2)        |
| crystal system      | Monoclinic                                                          | D <sub>calcd</sub> (g cm <sup>-3</sup> ) | 1.395         |
| space group         | P2(1)/c                                                             | μ (mm <sup>-1</sup> )                    | 0.074         |
| a (Å)               | 6.500(7)                                                            | θ range (deg)                            | 1.54 to 25.00 |
| b (Å)               | 26.53(3)                                                            | total no. of reflns                      | 13926         |
| c (Å)               | 12.800(13)                                                          | no. of unique reflns                     | 6885          |
| α (deg)             | 90                                                                  | no. of params refined                    | 542           |
| β (deg)             | beta = 104.287(14)                                                  | R1                                       | 0.0766        |
| γ (deg)             | 90                                                                  | wR2                                      | 0.2566        |
| V (Å <sup>3</sup> ) | 2139(4)                                                             | GOF                                      | 0.977         |
| CCDC number         | 96829                                                               |                                          |               |

Table S4 Selected Dihedral Angles and Interaction Patterns in the Crystals of **S3** and **TC**

|    |                                  | Dihedral<br>Angle (°) | interaction                                         | d (Å) | interaction                                         | d (Å) |
|----|----------------------------------|-----------------------|-----------------------------------------------------|-------|-----------------------------------------------------|-------|
| S3 | P <sub>A</sub> -P <sub>B</sub>   | 40.127                | O <sub>1</sub> -H <sub>1</sub> ...N <sub>2</sub>    | 1.892 | C <sub>13</sub> -H <sub>13</sub> ...π               | 3.250 |
|    | P <sub>B</sub> -P <sub>C</sub>   | 25.272                | O <sub>2</sub> -H <sub>2</sub> ...N <sub>5</sub>    | 1.882 | C <sub>30</sub> -H <sub>30</sub> ...π               | 2.984 |
|    | P <sub>A'</sub> -P <sub>B'</sub> | 40.539                | C <sub>28</sub> -H <sub>28A</sub> ...N <sub>3</sub> | 2.700 | C <sub>31</sub> -H <sub>31</sub> ...π               | 2.958 |
|    | P <sub>B'</sub> -P <sub>C'</sub> | 25.611                | C <sub>8</sub> -H <sub>8</sub> ...π                 | 2.995 | C <sub>46</sub> -H <sub>46</sub> ...π               | 3.351 |
| TC | P <sub>A</sub> -P <sub>B</sub>   | 28.982                | C <sub>3</sub> -H <sub>3</sub> ...O <sub>1</sub>    | 2.576 | C <sub>24</sub> -H <sub>24B</sub> ...F <sub>2</sub> | 2.521 |
|    | P <sub>B</sub> -P <sub>C</sub>   | 37.156                | C <sub>7</sub> -H <sub>7</sub> ...F <sub>1</sub>    | 2.611 | C <sub>16</sub> -H <sub>16</sub> ...N <sub>3</sub>  | 2.415 |
|    | P <sub>A</sub> -P <sub>D</sub>   | 1.024                 | C <sub>9</sub> -H <sub>9</sub> ...F <sub>2</sub>    | 2.630 | C <sub>7</sub> -H <sub>7</sub> ...π                 | 3.449 |
|    |                                  |                       | C <sub>21</sub> -H <sub>21A</sub> ...F <sub>2</sub> | 2.636 |                                                     |       |

## 5 Parameter of solvents

Table S5 The value of the refractive index (n), relative permittivity ( $\epsilon$ ) and orientation polarizability ( $\Delta f$ )

| Solution | $\epsilon$ | n      | $\Delta f$ |
|----------|------------|--------|------------|
| Benzene  | 2.28       | 1.5011 | 0.0026     |
| DCM      | 9.10       | 1.4244 | 0.2185     |
| THF      | 7.58       | 1.407  | 0.2097     |
| EA       | 6.02       | 1.3724 | 0.1997     |
| EtOH     | 25.70      | 1.3614 | 0.2903     |
| AN       | 37.50      | 1.3441 | 0.3055     |
| DMF      | 36.71      | 1.4282 | 0.2751     |
| DMSO     | 47.2       | 1.4795 | 0.2632     |

## 6 The molecular structure, dihedral angle and the distances of TC molecular interplanar.

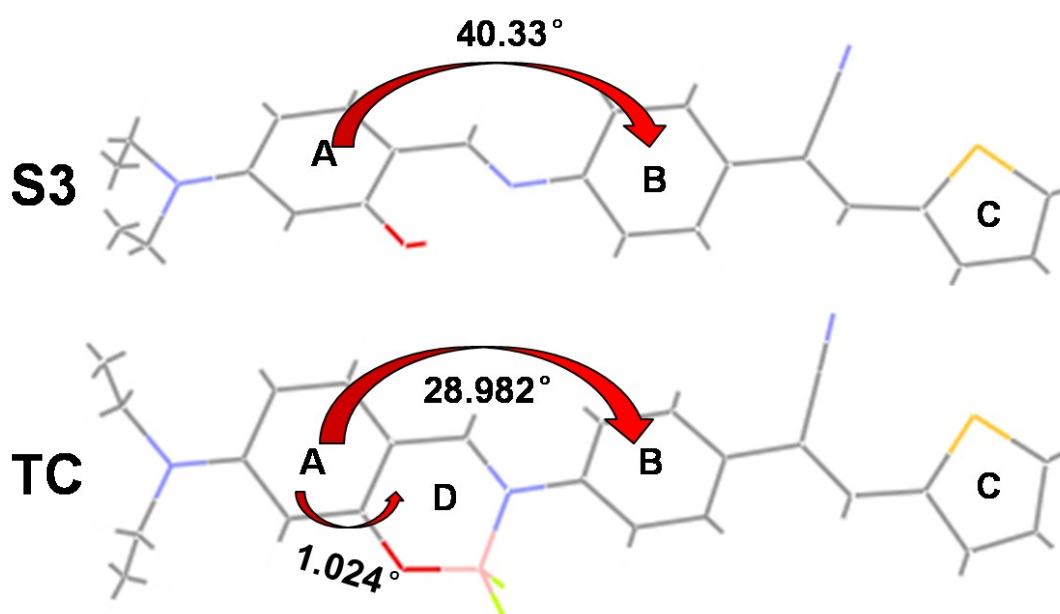

Fig. S6 The dihedral angle between aromatic ring A and B in molecular structure of S3 and TC.

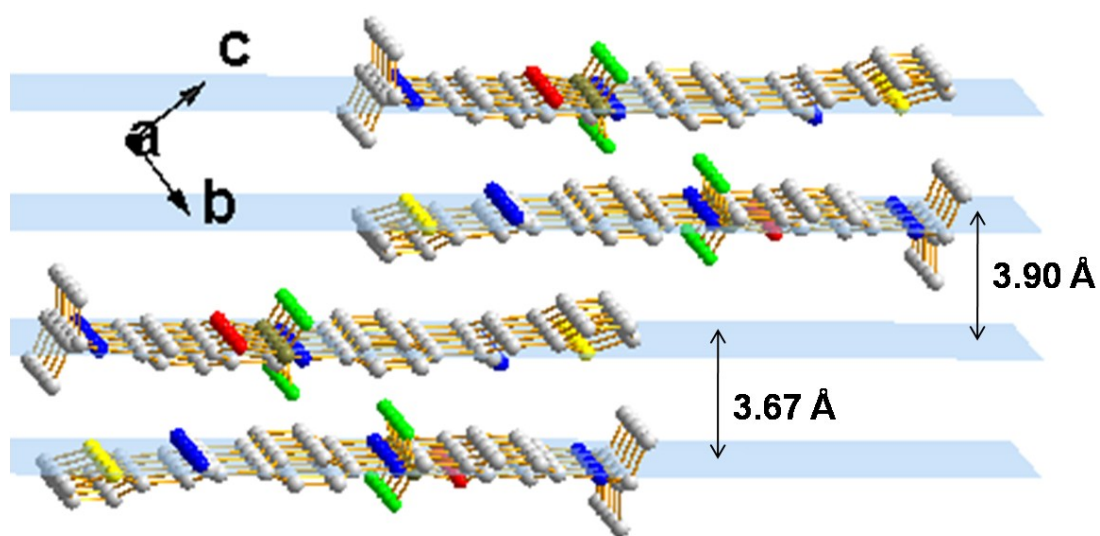

Fig. S7 . The interplanar distances of TC.

## 7 Electron density distributions of the frontier molecular orbitals

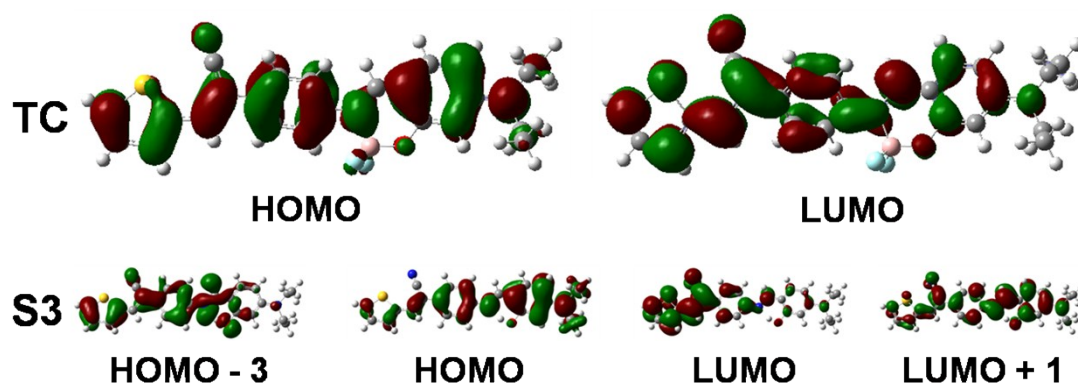

Fig. S8 Electron density distributions of the frontier molecular orbitals of compounds TC and S3 calculated at the B3LYP/6-31+G(d) level..
